# Supplementary material for: Precaution and Innovation in the Context of Wastewater Regulation: An Examination of Financial Innovation under UWWTD Disputes in London and Milan
Source: MDPI journal article supplement (doi:10.3390/su13169130), 2021-08-15
Supplement: s1 [file s1]

Archive with 1 entries (1 files):
- sustainability-1309381-supplementary.pdf
