# Supplementary material for: Precaution and Innovation in the Context of Wastewater Regulation: An Examination of Financial Innovation under UWWTD Disputes in London and Milan
Source: MDPI journal article supplement (doi:10.3390/su13169130), 2021-08-15
Supplement: s1 [file s1 › sustainability-1309381-supplementary.pdf]

# Supplementary Material

## Documents

The following provides an overview of the 224 documents that have been analyzed for this research project.

| Source                                                    | Number of Documents |
|-----------------------------------------------------------|---------------------|
| <b>Documents by responsible Ministries</b>                | 18                  |
| <b>Documents from Environmental Agencies</b>              | 15                  |
| <b>Documents from the European Commission</b>             | 27                  |
| <b>Documents from Local Administrations</b>               | 25                  |
| <b>Reports issued by Local Water Service Companies</b>    | 43                  |
| <b>Reports from Regulators and Oversight Institutions</b> | 37                  |
| <b>Reports from Investors</b>                             | 10                  |
| <b>Documents from Political Organizations</b>             | 9                   |
| <b>Expert Reports</b>                                     | 16                  |
| <b>Press Reports</b>                                      | 24                  |

## Interviews

Number of interviews conducted: 15

Anonymized with individualized acronym

1. Banker (B), Utility (U), Administration (A), Engineer (E), Initiative (I).
2. Number (#)

B1 (International Investment Bank) personal interview 1.3.2017  
B2 (European Investment Institution) personal interview 16.1.18  
B3 (International Investment Bank) personal interview 7.9.2016  
B4 (International Investment Bank) personal interview 4.3.2019  
I1 (Environmental Initiative) personal interview 12.9.2016  
A1 (Local Authority) personal interview 15.9.2016  
A2 (Local Authority) personal interview 23.9.2016  
A3 (Local Authority) personal interview 23.9.2016  
A4 (Local Authority) personal interview 6.3.2019  
A5 (Regulator) personal interview 27.9.2016  
U1 (Service Provider) personal interview 12.10.16  
U2 (Service Provider) personal interview 12.10.16  
U3 (Service Provider) personal interview 13.3.19  
E1 (Independent Consultant) personal interview 14.11.17  
E2 (Developer) personal interview 22.11.17
